# Supplementary material for: Prostate Cancer Patients–Negative Biopsy Controls Discrimination by Untargeted Metabolomics Analysis of Urine by LC-QTOF: Upstream Information on Other Omics
Source: PubMed Central journal article supplement (PMC5133625; doi:10.1038/srep38243), 2016-12-02
Supplement: srep38243-s1.pdf [file srep38243-s1.pdf]

**Prostate Cancer Patients – Negative Biopsy Controls**  
**Discrimination by Untargeted Metabolomics Analysis of**  
**Urine by LC-QTOF: Upstream Information on Other Omics**

M.A. Fernández-Peralbo<sup>a,b</sup>, E. Gómez-Gómez<sup>b,c</sup>, M. Calderón Santiago<sup>a,b</sup>, J. Carrasco-Valiente<sup>b,c</sup>, J. Ruiz-García<sup>b,c</sup>, M.J. Requena-Tapia<sup>b,c</sup>, M.D. Luque de Castro<sup>a,b\*</sup>, F. Priego-Capote<sup>a,b\*</sup>

*<sup>a</sup>Department of Analytical Chemistry, Annex Marie Curie Building, Campus of Rabanales, University of Córdoba, E-14071, Córdoba, Spain.*

*<sup>b</sup>Institute of Biomedical Research Maimónides (IMIBIC), Reina Sofía University Hospital, University of Córdoba, E-14004, Córdoba, Spain.*

*<sup>c</sup>Department of Urology (IMIBIC), Reina Sofía University Hospital, University of Córdoba, E-14004, Córdoba, Spain.*

Correspondence: F. Priego Capote and M.D. Luque de Castro, Department of Analytical Chemistry, Annex Marie Curie Building, Campus of Rabanales, 14071 Córdoba, Spain.

E-mails: q72prcaf@uco.es (F. Priego-Capote) and qa1lucam@uco.es (M.D. Luque de Castro).

Tel. and fax number: 34 957 218615.

**Supplementary Table 1.** Reproducibility values for all identified metabolites, expressed as relative standard deviation (% RSD), calculated prior to and post MSTUS normalization.

| Compound Name                      | Reproducibility (% RSD)   |                          |
|------------------------------------|---------------------------|--------------------------|
|                                    | Prior MSTUS normalization | Post MSTUS normalization |
| 2-oxoglutaramate                   | 21.65                     | 12.66                    |
| 2-pyrrolidone-5-carboxylate        | 25.27                     | 15.90                    |
| 4-aminohippuric acid               | 13.38                     | 6.76                     |
| 4-hydroxy-4-methyl-2-oxoadipate    | 18.53                     | 10.59                    |
| 5,6-dihydrouridine                 | 21.07                     | 14.06                    |
| 5-acetamidovalerate                | 20.69                     | 8.81                     |
| 5-methyldeoxycytidine-5'-phosphate | 12.51                     | 5.40                     |
| 7,8-dihydroneopterin               | 20.46                     | 14.29                    |
| 7-methylguanine                    | 24.49                     | 10.65                    |
| 7-methylguanosine                  | 11.72                     | 6.49                     |
| 8-methoxykynurenate                | 13.10                     | 9.08                     |
| Acetylarginine                     | 16.26                     | 7.21                     |
| Acetylaspartate                    | 20.25                     | 10.77                    |
| Acetylaspartylglutamic acid        | 14.06                     | 8.14                     |
| Acetylcitrulline                   | 13.12                     | 3.15                     |
| Acetylhistidine                    | 26.23                     | 16.00                    |
| Acetyllysine                       | 17.16                     | 4.49                     |
| Acetylputrescine                   | 33.09                     | 16.26                    |
| Acetyltaurine                      | 20.15                     | 13.14                    |
| Citrulline                         | 20.98                     | 12.06                    |
| Dimethylarginine                   | 25.05                     | 10.37                    |
| Dimethylheptanoylcarnitine         | 13.49                     | 8.52                     |
| Dimethyllysine                     | 18.01                     | 10.57                    |
| Estrone                            | 7.80                      | 7.44                     |
| Histidine                          | 20.46                     | 9.92                     |
| Imidazole lactate                  | 28.46                     | 16.00                    |
| Isethionate                        | 22.51                     | 13.70                    |
| Kynurenic acid                     | 15.36                     | 5.81                     |
| Methylhistidine                    | 26.97                     | 14.70                    |
| Nicotinic acid                     | 24.50                     | 14.87                    |
| Phenylalanine                      | 15.50                     | 5.27                     |
| Phosphoric acid                    | 32.19                     | 16.90                    |
| Sialyl-N-acetyllactosamine         | 20.20                     | 15.45                    |
| Sulfoacetate                       | 13.58                     | 7.12                     |
| Threonine                          | 23.92                     | 13.35                    |
| Tiglylcarnitine                    | 12.47                     | 8.37                     |
| Trimethyllysine                    | 17.04                     | 13.38                    |
| Tyrosine                           | 14.81                     | 5.26                     |
| Urea                               | 21.60                     | 14.90                    |
| Uric acid                          | 25.43                     | 12.81                    |
| Vanillylmandelic acid              | 16.05                     | 5.89                     |
| Xanthurenic acid                   | 14.31                     | 6.50                     |

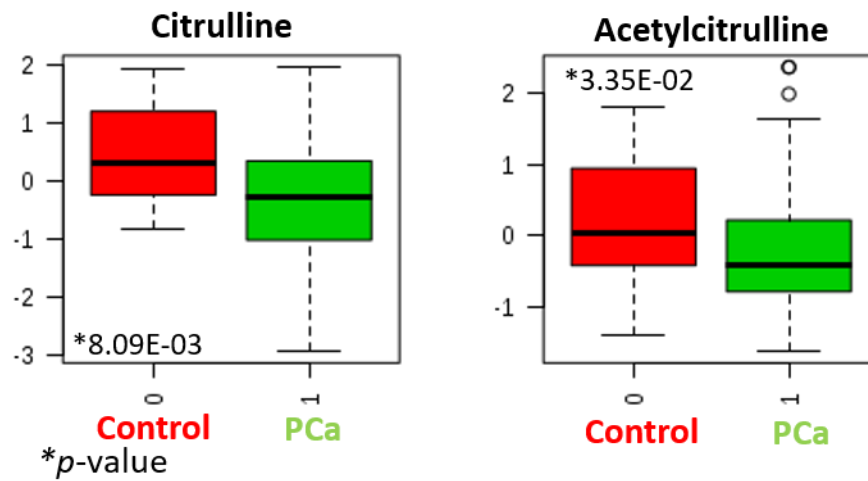

**Supplementary Figure 1.** Box and whisker plots from citrulline and acetylcitrulline in the two evaluated groups.

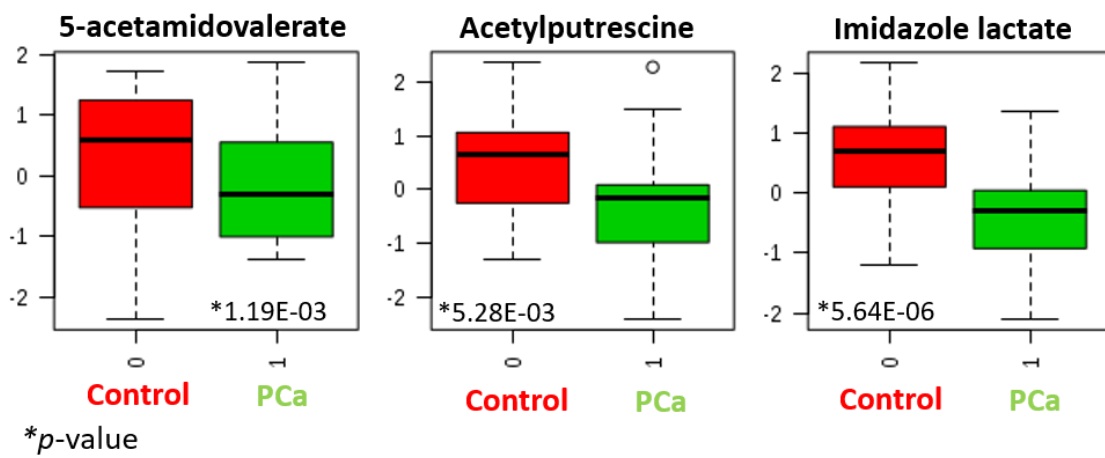

**Supplementary Figure 2.** Box and whisker plots from 5-acetamidovalerate, acetylputrescine and imidazole lactate in the two evaluated groups.
